# Supplementary material for: DNA methylation, combined with RNA sequencing, provide novel insight into molecular classification of chordomas and their microenvironment
Source: PubMed Central journal article supplement (PMC10337070; doi:10.1186/s40478-023-01610-0), 2023-07-11

# Chordoma I

Sample 1; Immune score=0.34

Sample 2; Immune score=0.65

Sample 3; Immune score=0.24

Sample 4; Immune score=0.25

Sample 5; Immune score=0.13

CD3

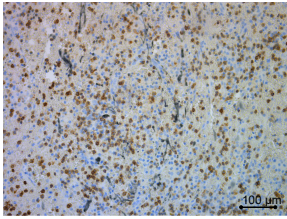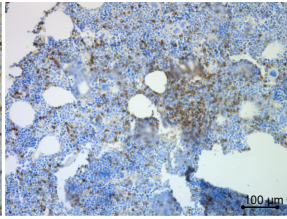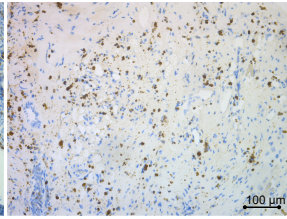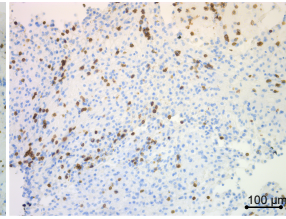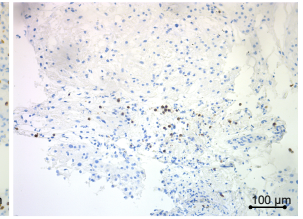

CD8

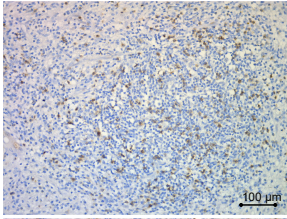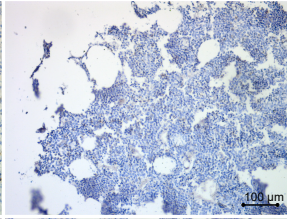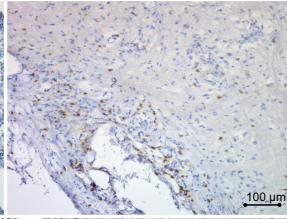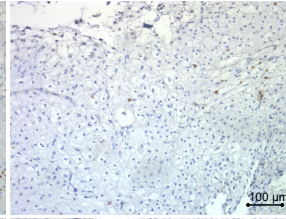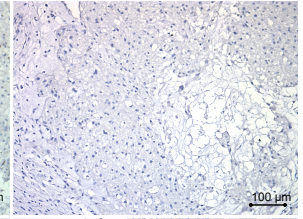

CD4

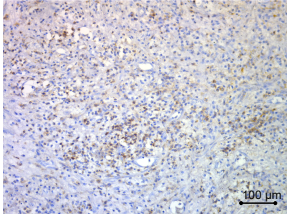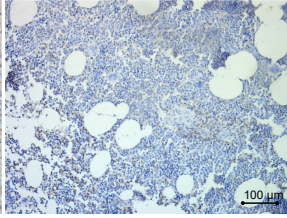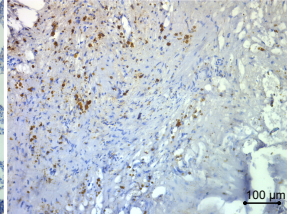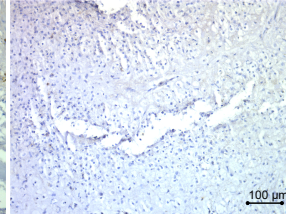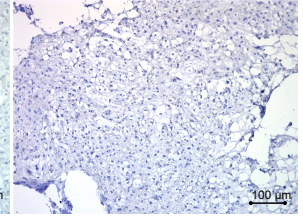

# Chordoma C

Sample 6; Immune score=0.13

Sample 7; Immune score=0.25

Sample 8; Immune score=0.20

Sample 9; Immune score=0.21

Sample 10; Immune score=0.12

CD3

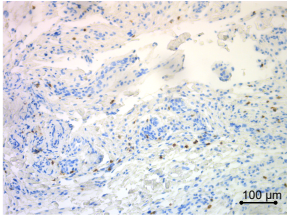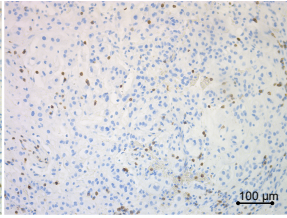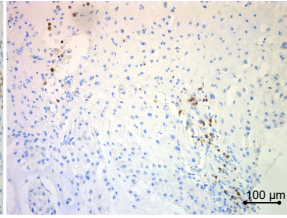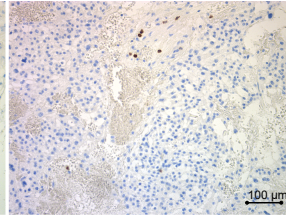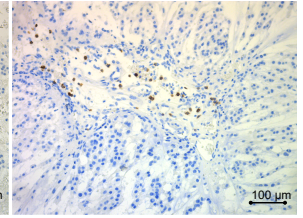

CD8

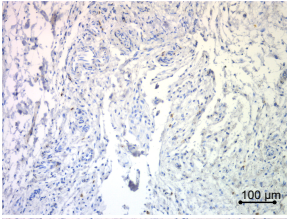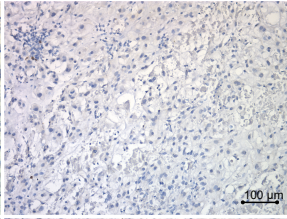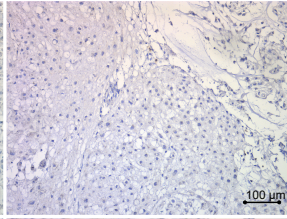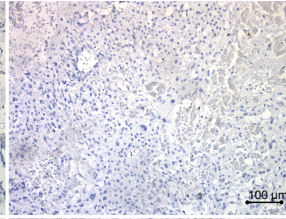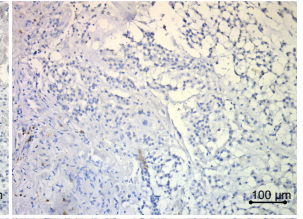

CD4

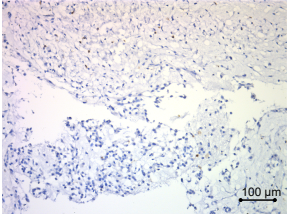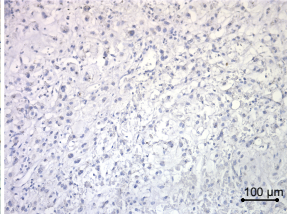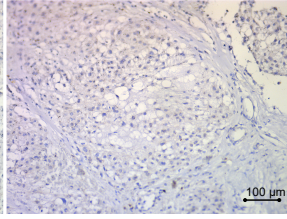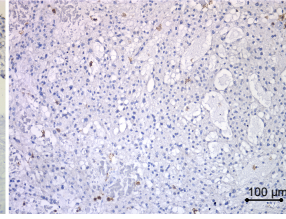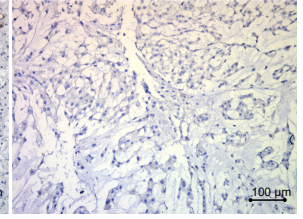

Supplement: 40478_2023_1610_MOESM4_ESM.pdf [file 40478_2023_1610_MOESM4_ESM.pdf]
