# Supplementary material for: DNA methylation, combined with RNA sequencing, provide novel insight into molecular classification of chordomas and their microenvironment
Source: PubMed Central journal article supplement (PMC10337070; doi:10.1186/s40478-023-01610-0), 2023-07-11

### Expression

### Methylation

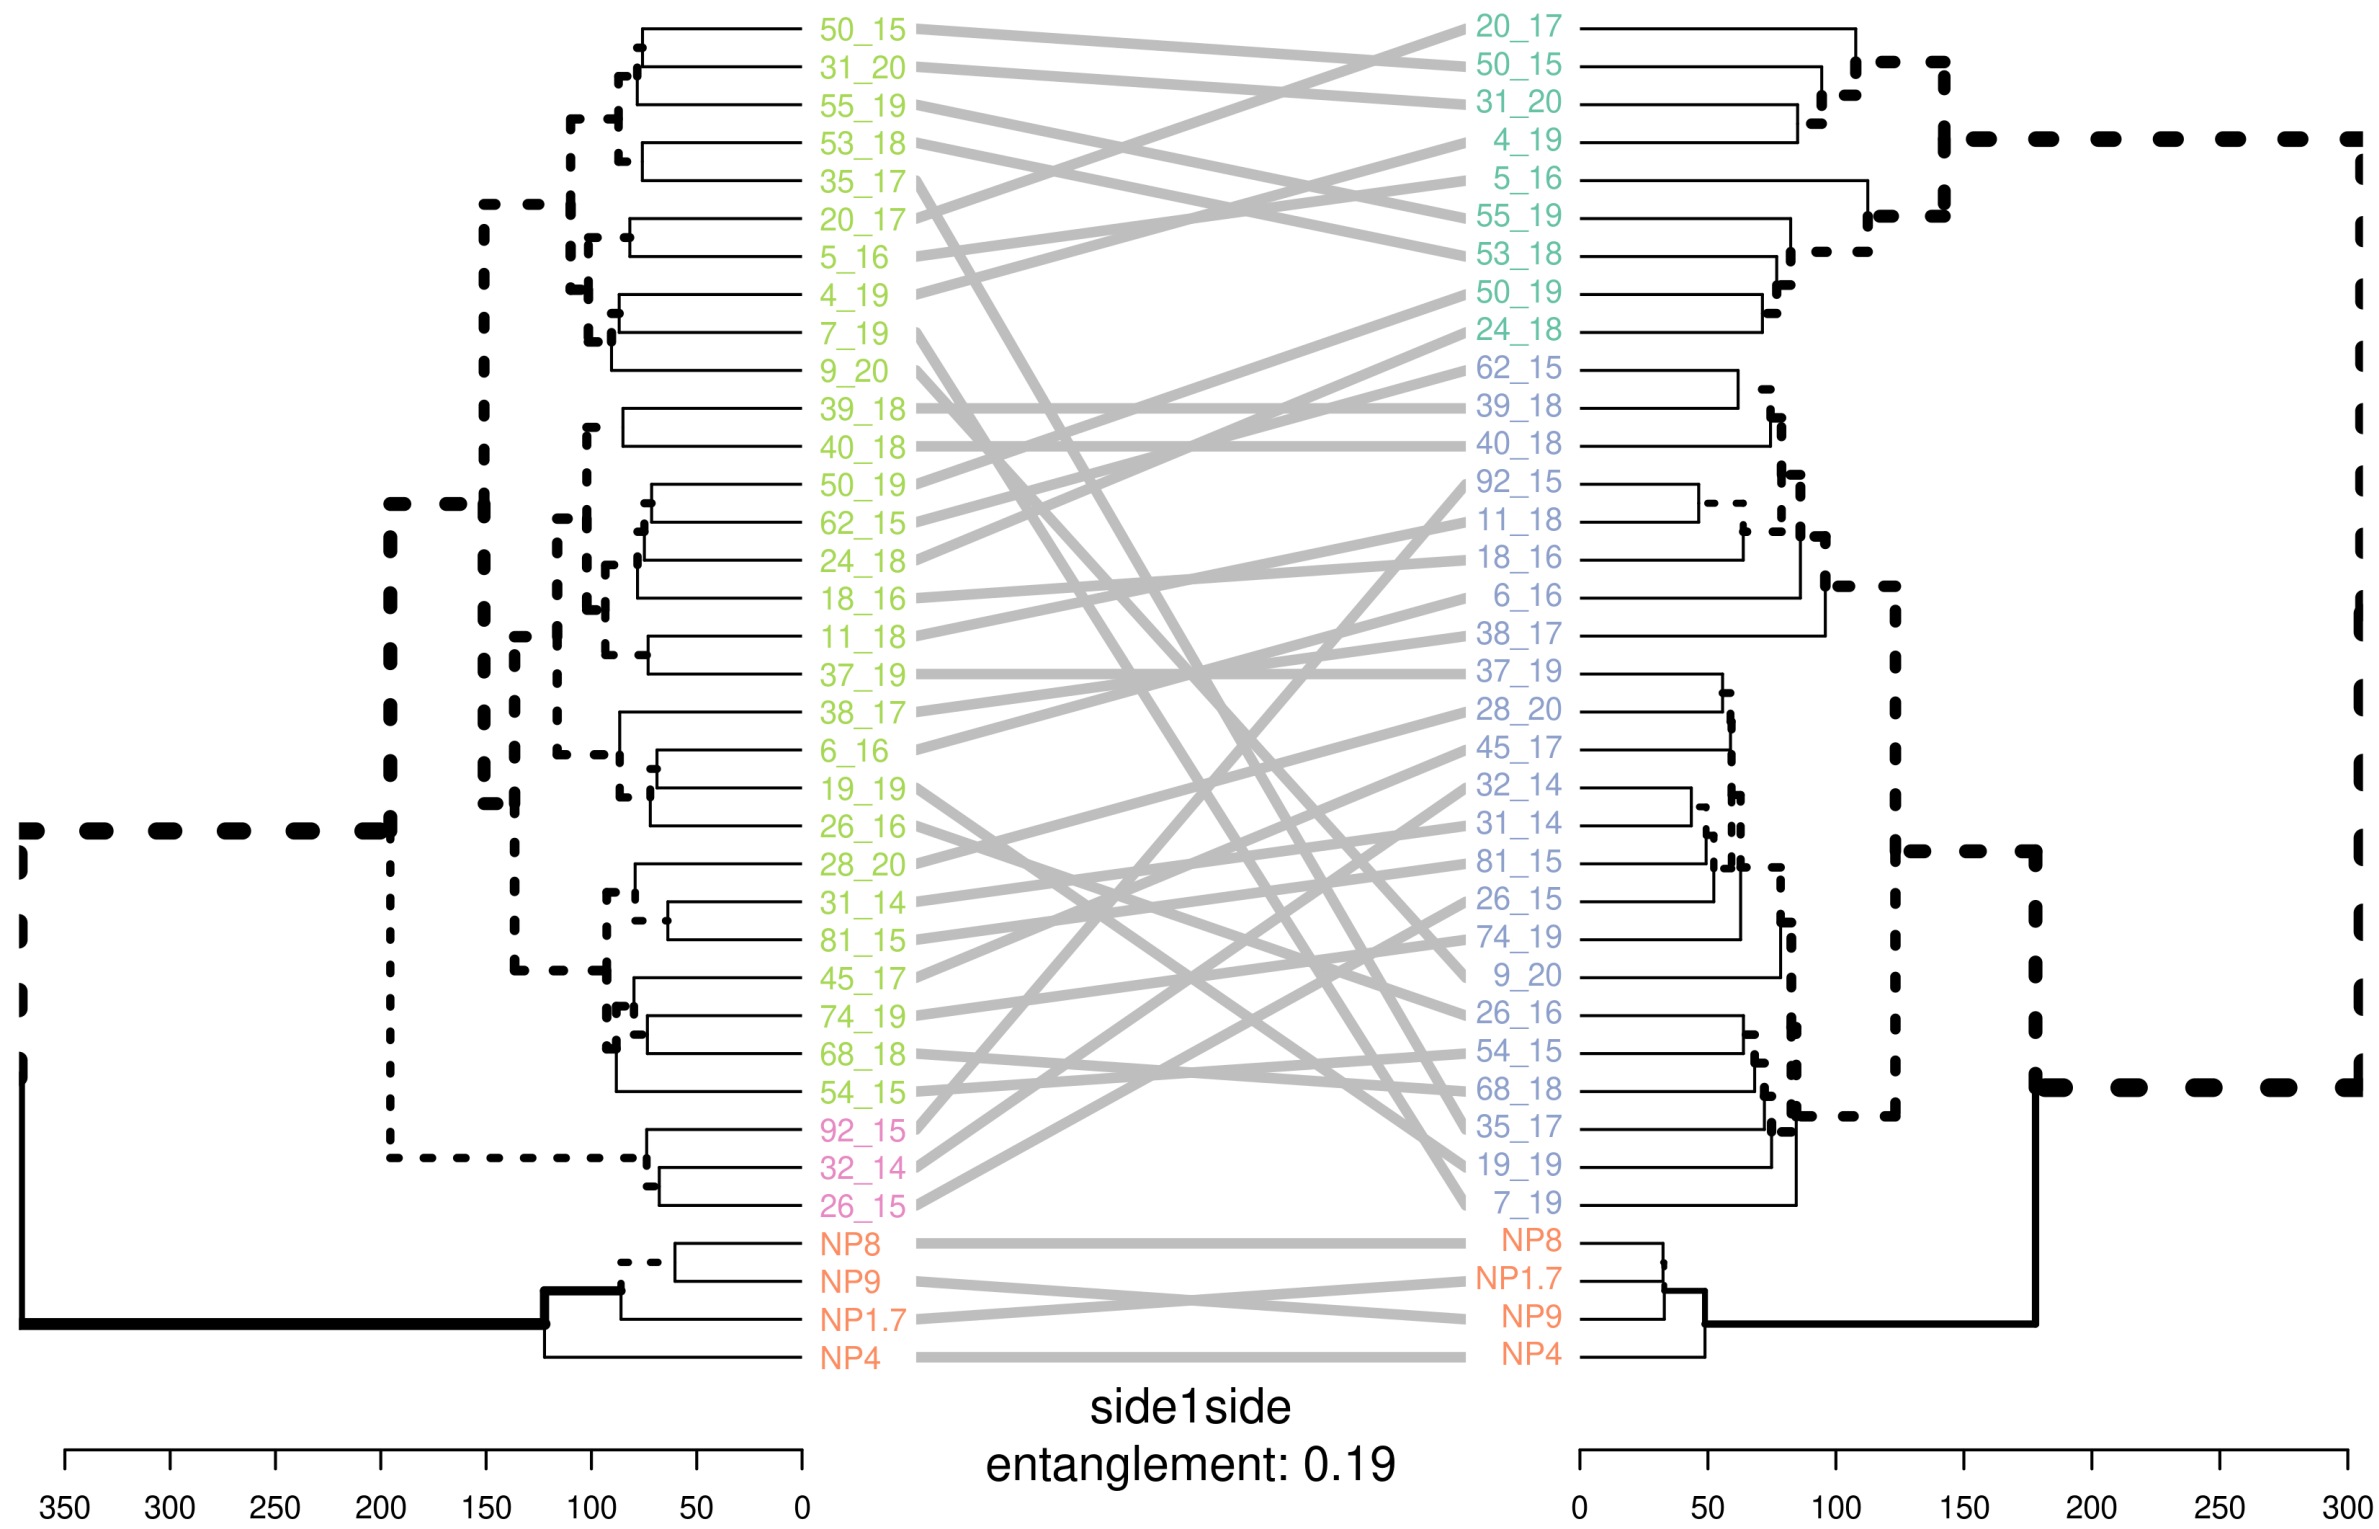

### Expression

### Methylation

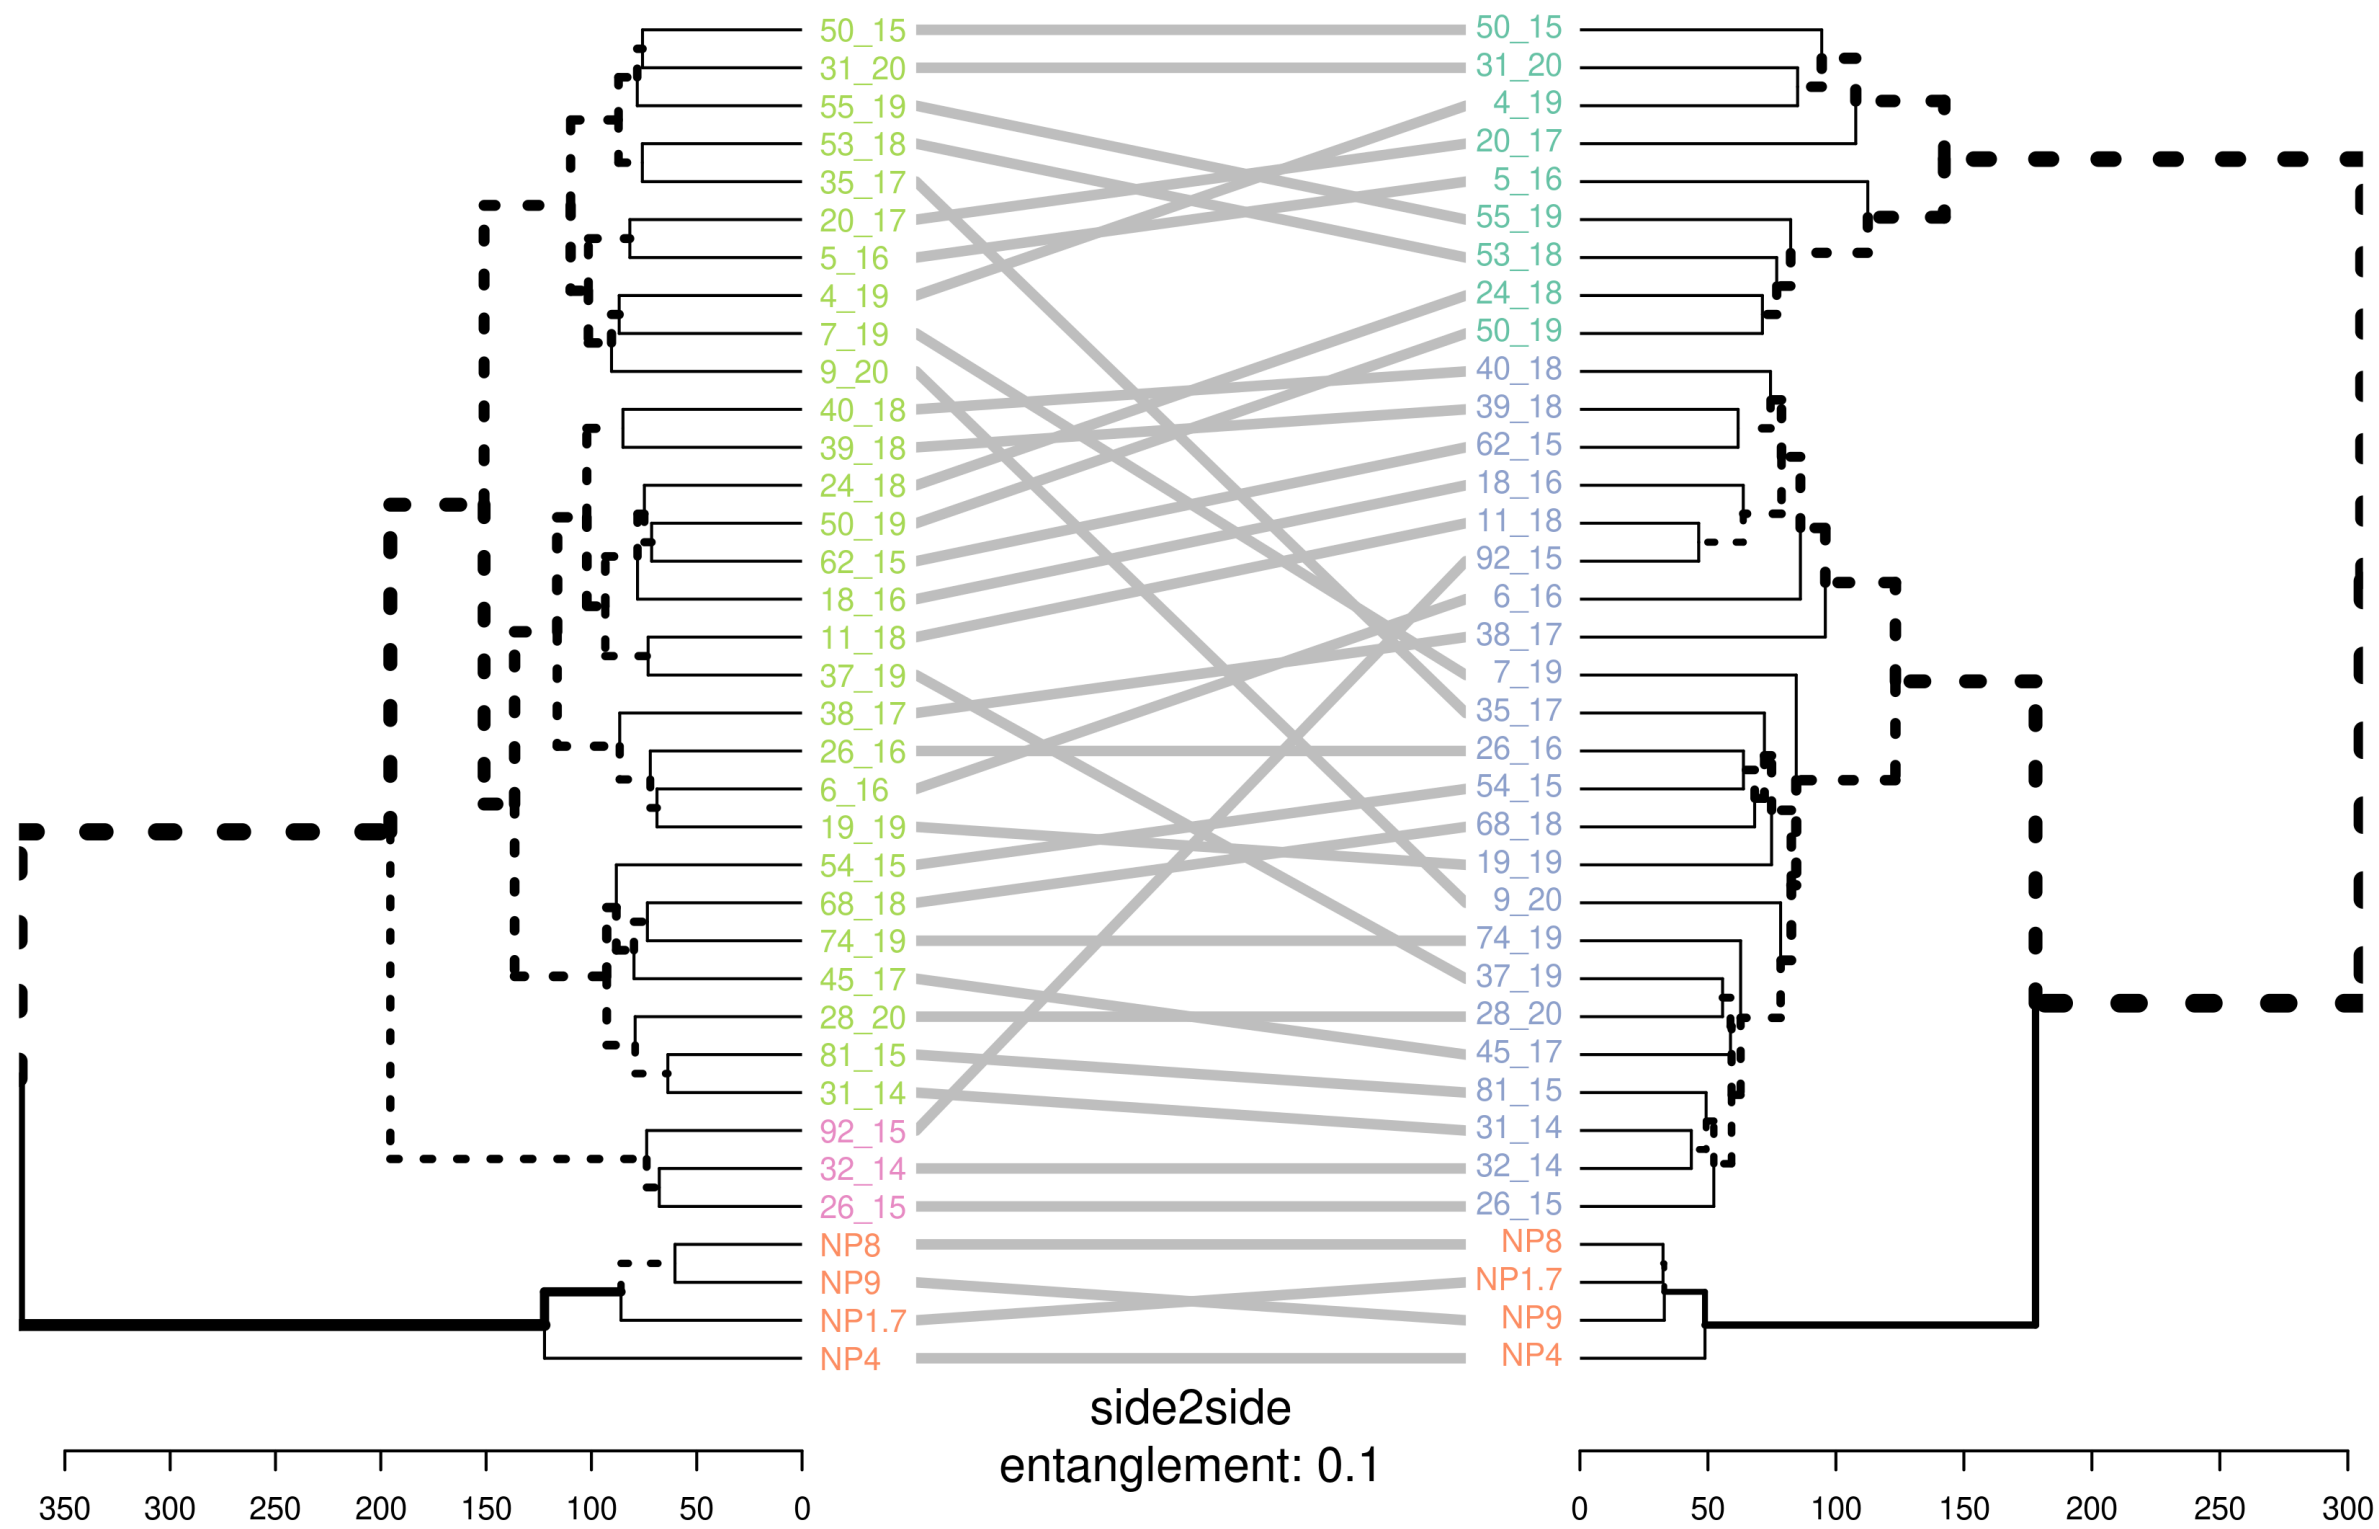

Supplement: 40478_2023_1610_MOESM1_ESM.pdf [file 40478_2023_1610_MOESM1_ESM.pdf]
